# Supplementary material for: Associations of functional human leucocyte antigen class I groups with HIV viral load in a heterogeneous cohort
Source: PubMed Central journal article supplement — AIDS. 2023 Apr 3;37(11):1643–50. doi: 10.1097/QAD.0000000000003557 (PMC10399941; doi:10.1097/qad.0000000000003557), 2023-04-03
Supplement: aids-37-1643-s001.pdf [file aids-37-1643-s001.pdf]

1 **Title page**

2 *Original paper*

3 **Title**

4 Associations of functional HLA class I groups with HIV viral load in a heterogeneous cohort.

5 **Running head**

6 Functional HLA clusters and HIV-1 viral load

7 **Authors**

8 Adrian G. ZUCCO<sup>1</sup>, Marc BENNEDBÆK<sup>2</sup>, Christina EKENBERG<sup>1</sup>, Migle GABRIELAITE<sup>3</sup>, Preston LEUNG<sup>1</sup>, Mark N.  
9 POLIZZOTTO<sup>4</sup>, Virginia KAN<sup>5</sup>, Daniel D. MURRAY<sup>1</sup>, Jens D. LUNDGREN<sup>1</sup> and Cameron R. MACPHERSON<sup>1</sup> for  
10 the INSIGHT START study group.

11 **Affiliations**

12 <sup>1</sup>PERSIMUNE Center of Excellence, Rigshospitalet, Copenhagen, Denmark

13 <sup>2</sup>Virus Research and Development Laboratory, Virus and Microbiological Special Diagnostics, Statens Serum  
14 Institut, Copenhagen, Denmark

15 <sup>3</sup>Center for Genomic Medicine, Copenhagen University Hospital, Copenhagen, Denmark.

16 <sup>4</sup>Clinical Hub for Interventional Research, College of Health and Medicine, The Australian National University,  
17 Canberra, Australia

18 <sup>5</sup>George Washington University, Veterans Affairs Medical Center, Washington D.C, U.S.A.

19 **Corresponding author**

20 Adrian Gabriel Zucco, MSc., PhD.

21 Tel: +45 35 45 57 75

22 mail: [adrian.gabriel.zucco@regionh.dk](mailto:adrian.gabriel.zucco@regionh.dk)

23 Rigshospitalet, Copenhagen University Hospital

24 Centre of Excellence for Health, Immunity and Infections (CHIP) & PERSIMUNE

25 Blegdamsvej 9, DK-2100 Copenhagen Ø, Denmark

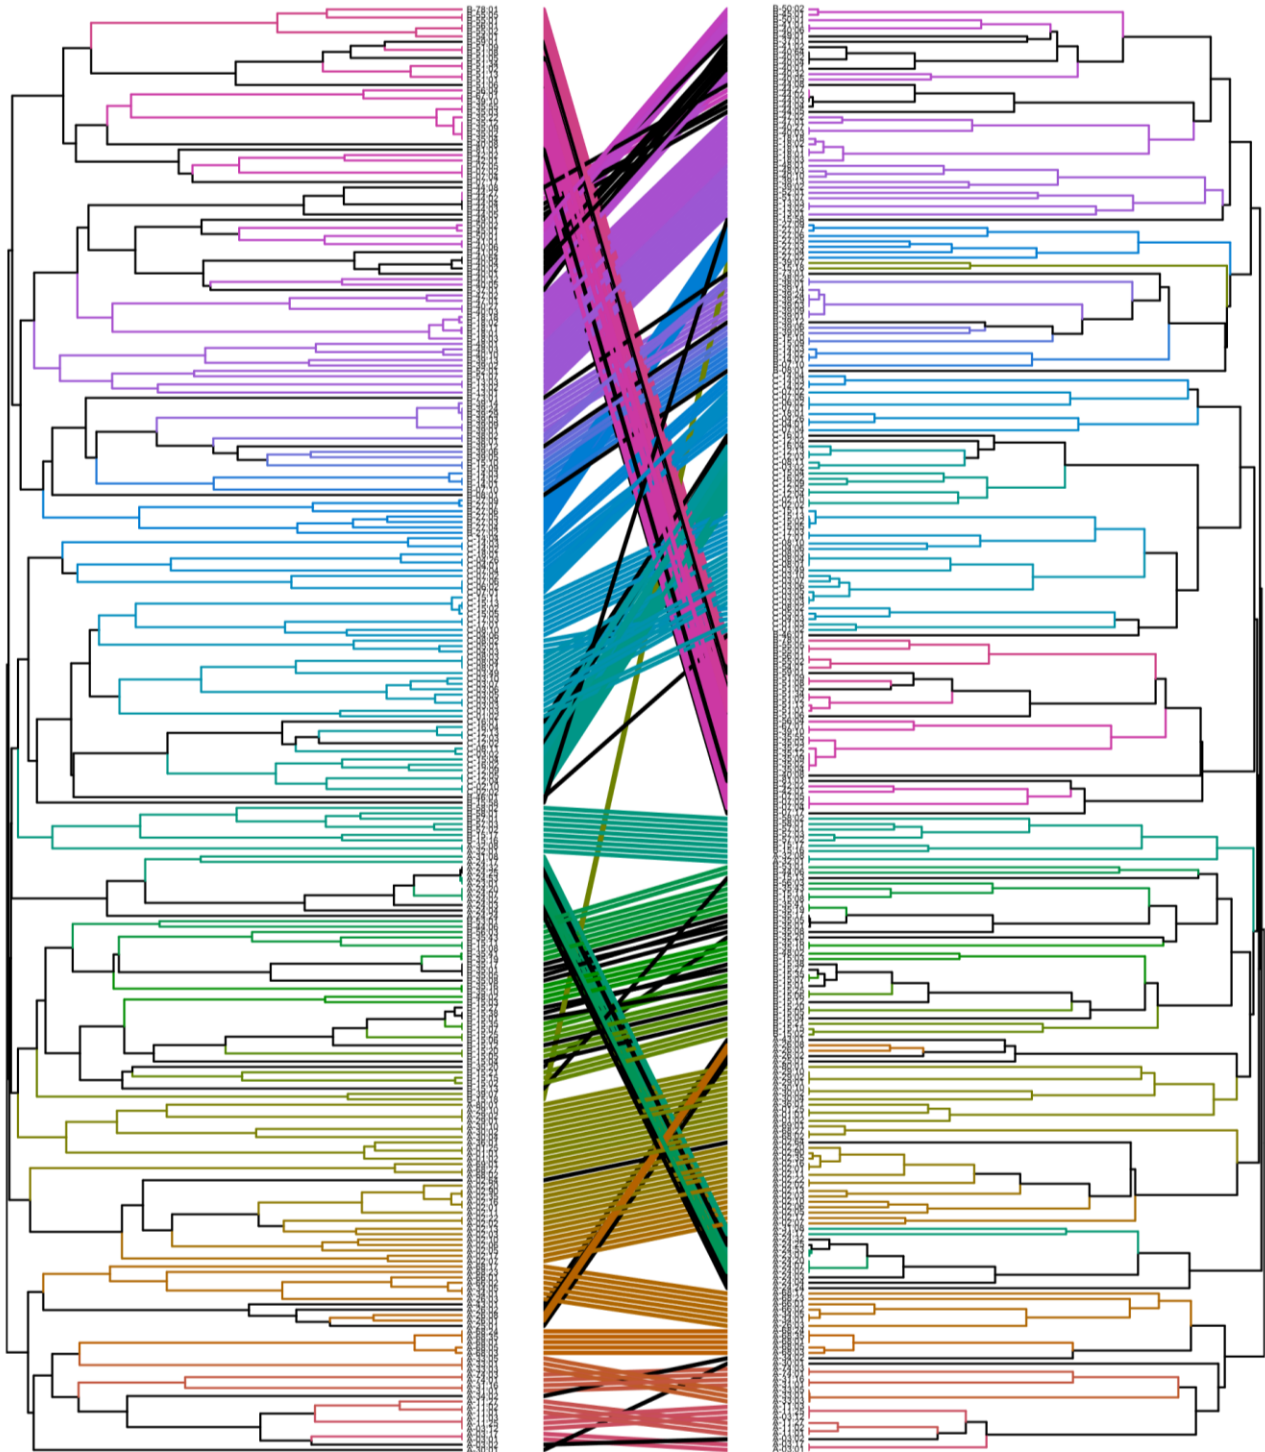

26

27 **Figure S1. Tanglegram of consensus clustering from predicted immunopeptidomes based on**  
 28 **random versus HIV-specific peptides.**

29 Two different peptide sets were used for consensus clustering based on predicted immunopeptidomes to  
 30 268 HLA class I alleles. On the left, a dendrogram generated from  $5 \times 10^5$  random peptides is compared to a  
 31 dendrogram generated from 173,792 HIV peptides. Black branches and lines connecting both dendrograms  
 32 indicate differences in clustering among both dendrograms.

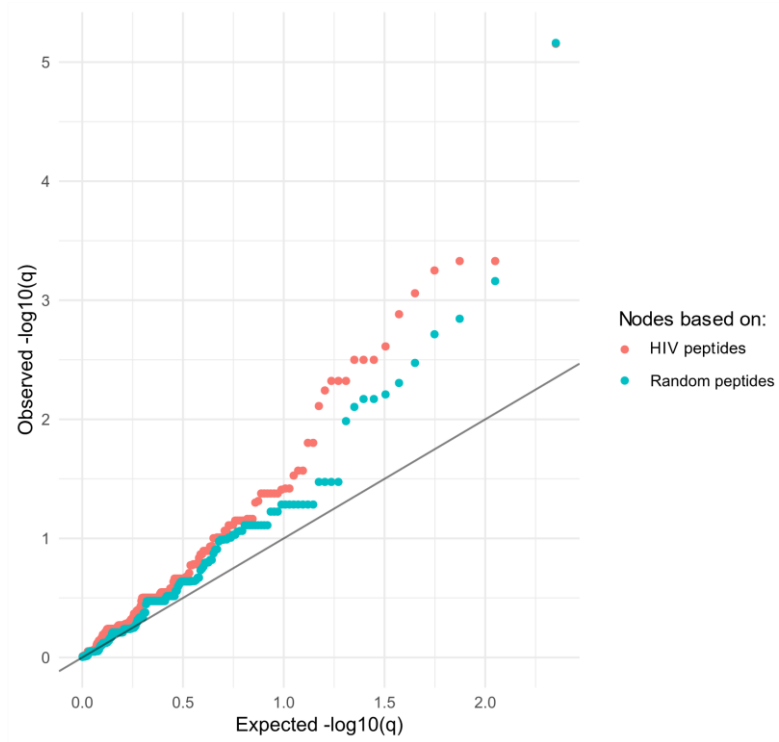

33

34 **Figure S2. Q-Q plot of observed versus theoretical q-values from associations to HIV-VL from HLA**  
 35 **functional nodes**

36 HLA functional nodes were generated by consensus clustering of predicted HIV-specific immune peptidomes  
 37 (red) and unspecific predicted immunopeptidomes from random peptides (blue).

38

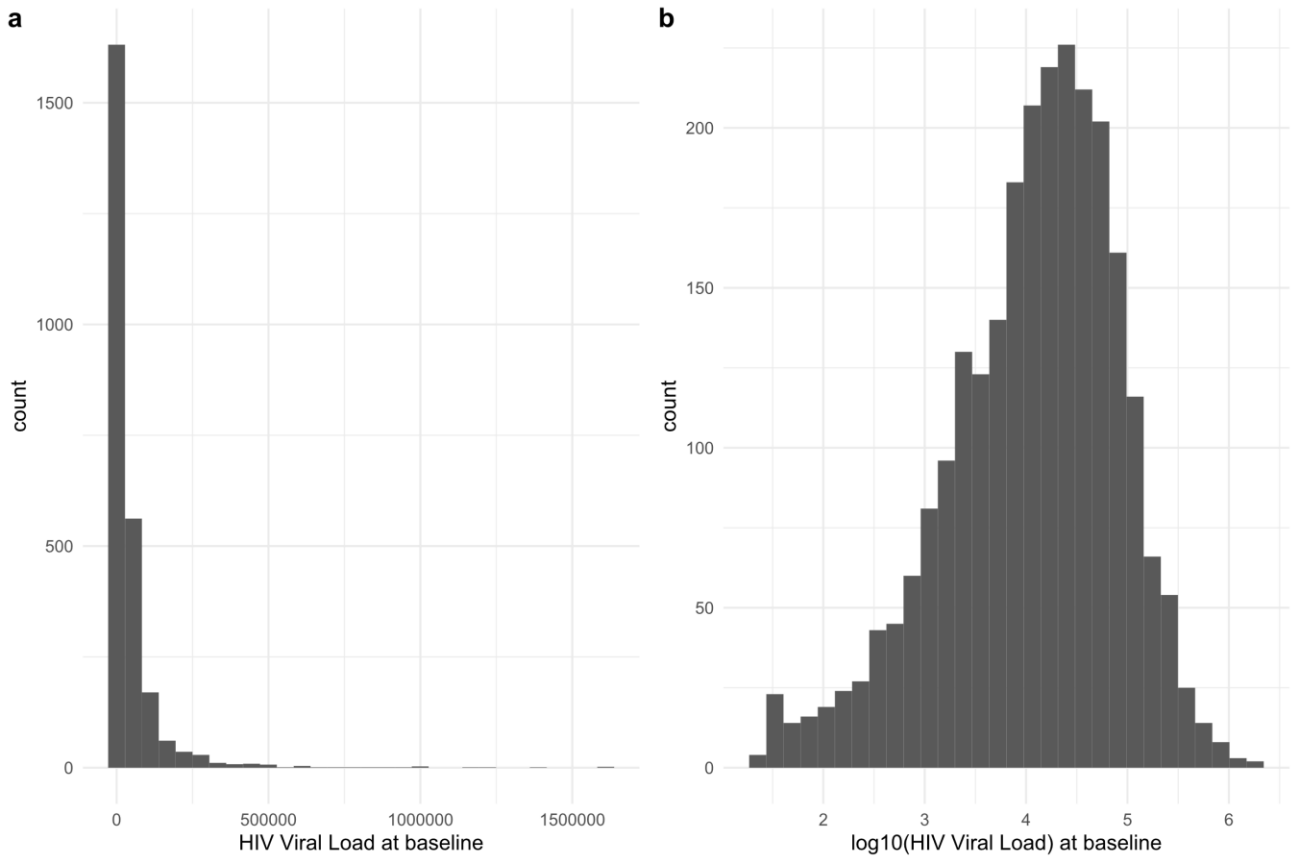

39

40 **Figure S3. Histograms of HIV viral load**

41 Histogram of HIV viral load (a) and log<sub>10</sub>-transformed HIV viral load (b) measured once in participants of the  
42 START study at entry.

43

| Alleles in the tested node                                                                                                                                    | Adjustment by sex, country, and race |            | Adjustment by sex and PC1-4 |            |
|---------------------------------------------------------------------------------------------------------------------------------------------------------------|--------------------------------------|------------|-----------------------------|------------|
|                                                                                                                                                               | Estimate                             | q-value    | Estimate                    | q-value    |
| B-57:03   B-57:02   B-57:01   B-58:01                                                                                                                         | -0.2502                              | 7.0217E-06 | -0.2570                     | 3.6756E-06 |
| C-08:01   C-08:04                                                                                                                                             | -0.2863                              | 4.1949E-02 | -0.2600                     | 7.7905E-02 |
| B-44:05   B-44:08   B-44:04   B-44:03   B-44:02   B-44:27                                                                                                     | 0.1483                               | 3.1637E-03 | 0.1549                      | 2.0194E-03 |
| B-56:03   B-35:43   B-15:08   B-15:11   B-35:08   B-35:19   B-35:41   B-35:01   B-35:17   B-35:05   B-35:20   B-35:16   B-35:10   B-15:13   B-53:01   B-44:06 | 0.1324                               | 4.8579E-02 | 0.1188                      | 8.1062E-02 |

44 **Table S1. Estimates and q-values of a sensitivity analysis comparing the use of self-reported race**  
45 **and country versus Principal Components for adjustment of population stratification in**  
46 **association testing of relevant HLA functional nodes to log<sub>10</sub>-transformed HIV VL**

47 Associations to log<sub>10</sub>-transformed HIV VL with each HLA functional node in the consensus tree were tested  
48 and adjusted by sex, country and self-reported race or sex and the first four principal components computed  
49 by Principal Component Analysis (PCA) excluding the HLA region. The estimate corresponds to the  $\beta$   
50 parameter of the fitted linear models and q-values refer to the adjusted p-values for multiple testing using a  
51 Benjamini-Hochberg procedure.
